# Supplementary material for: Development of an epigenetic tetracycline sensor system based on DNA methylation
Source: PLOS journal article supplement (doi:10.1371/journal.pone.0232701), 2020-05-07
Supplement: S5 (10.1371/journal.pone.0232701.s005) [file journal.pone.0232701.s005]

**Supplemental Text 1: List of all plasmids used in this paper.**

**Memory plasmid:** The DNA sequence is given and annotated in Supplementary Note 1 of Maier et al. (2017). The plasmid map is provided below.

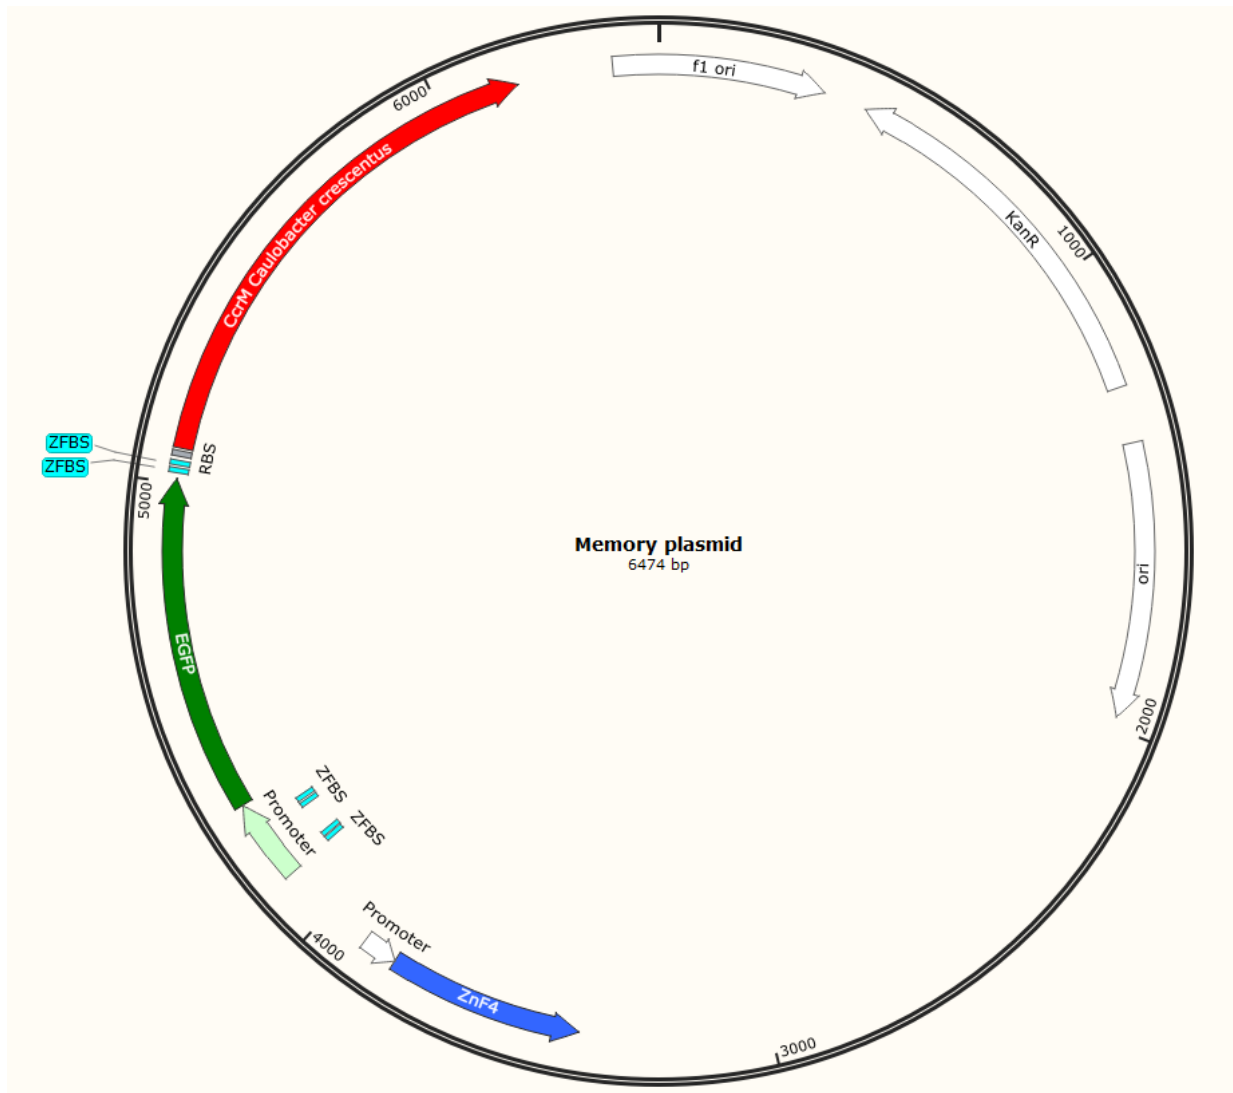

**Negative control memory plasmid:** The Negative control memory plasmid is identical to the Memory plasmid, except the D31A mutation in the *ccrM* gene, which leads to catalytic inactivation.

**Arabinose trigger plasmid:** The map of the arabinose trigger plasmid can be found in Maier et al. (2017) Supplementary Figure 7 B.

**Tetracycline trigger plasmid:** The plasmid map of the tetracycline trigger plasmid can be found in this work (Figure 4 B) and the annotated DNA sequence in Supplemental Text 2.
